# Long-Term Imaging of Living Adult Zebrafish

Daniel Castranova, Bakary Samasa, Marina Venero Galanternik, Aniket V. Gore, Allison E. Goldstein, Jong S. Park, and Brant M. Weinstein<sup>#</sup>

Division of Developmental Biology, *Eunice Kennedy Shriver* National Institute of Child Health and Human Development, NIH, Bethesda, MD, USA.

<sup>#</sup> To whom correspondence should be addressed

Brant M. Weinstein

WeinsteB@mail.nih.gov

Section on Vertebrate Organogenesis, Building 6B, Room 4B413

6 Center Drive, Bethesda, MD 20892

Key Words: Zebrafish, Adult, Imaging, Intubation, Neutrophil, Lymphatic

## SUMMARY STATEMENT

We describe a new method for intubating and imaging living adult zebrafish designed for inverted microscopes and we show that fish can be intubated and imaged overnight.

## ABSTRACT

The zebrafish has become a widely used animal model due in large part to its accessibility to and usefulness for high-resolution optical imaging. Although zebrafish research has historically focused mostly on early development, in recent years the fish has increasingly been used to study regeneration, cancer metastasis, behavior, and other processes taking place in juvenile and adult animals. However, imaging of live adult zebrafish is extremely challenging, with survival of adult fish limited to a few tens of minutes using standard imaging methods developed for zebrafish embryos and larvae. Here, we describe a new method for imaging intubated adult zebrafish using a specially designed 3D printed chamber for long-term imaging of adult zebrafish on inverted microscope systems. We demonstrate the utility of this new system by nearly day-long observation of neutrophil recruitment to a wound area in living double-transgenic adult *casper* zebrafish with fluorescently labeled neutrophils and lymphatic vessels, as well as intubating and imaging the same fish repeatedly. We also show that Mexican Cavefish can be intubated and imaged in the same way, showing this method can be used for long-term imaging of adult animals from diverse aquatic species.

## INTRODUCTION

High-resolution *In vivo* imaging of developmental, regenerative, or other processes in vertebrate animals is extremely challenging after embryonic or early larval stages, involving sophisticated technical methods to ensure the health and survival of heavily anesthetized, rigidly immobilized juvenile or adult animals. Although a variety of methods have been developed for long-term anesthetization and imaging of terrestrial vertebrates, including humans and research models such as mice, rats, and cats, there has been limited application of these sorts of methodologies to aquatic vertebrates, despite their wide use as powerful research model organisms. The zebrafish is the most widely used aquatic vertebrate model organism. Zebrafish are small, allowing many fish to be housed in a relatively small space, and they produce large numbers of externally developing offspring at frequent intervals for genetic and experimental studies. Mutagenesis screens in fish have identified thousands of mutations with defects in embryonic development (Driever et al., 1996; Mullins et al., 1994) whose characterization has led to innumerable important new insights (Patton and Zon, 2001), and reverse genetic tools such as morpholinos (Nasevicius and Ekker, 2000) and CRISPR (Hwang et al., 2013) have been used to target specific genes of interest. The optical clarity of zebrafish embryos and early larvae facilitates very high-resolution optical imaging of all developing organs and tissues, including those deep within the animal. Thousands of transgenic lines have been developed that permit spatial and temporal control of gene expression (Scheer and Campos-Ortega, 1999; Wyart et al., 2009) or use fluorescent reporters to “mark” and permit study of a wide variety of different organs and tissues, including blood and lymphatic vessels (Jung et al., 2017; Lawson and Weinstein, 2002; Yaniv et al., 2006), the nervous system (Wyart and Del Bene, 2011), the liver and pancreas (Ober et al., 2003), and many others.

Although the historical focus of zebrafish research has been on embryonic and larval development, there has recently been increasing interest in using zebrafish to study processes such as disease and tissue regeneration in adults. Studies in adult zebrafish have led to novel insights into cancer metastasis (Kaufman et al., 2016) with potential for new treatments (Frantz and Ceol, 2020). Human tumors transplanted into zebrafish are being used as a platform for developing precision cancer therapies (Fazio et al., 2020; Yan et al., 2019). Zebrafish have also been used to model obesity and diabetes, with recent work showing that the pathophysiological pathways are conserved between mammals and zebrafish (Oka et al., 2010). The ability of zebrafish to regenerate complex tissues including the fins (Johnson and Weston, 1995) and heart (Poss et al., 2002), makes them a superb model for understanding mechanisms controlling tissue regeneration. There are also many tissues and processes that do not exist during early embryonic and larval development such as the newly described intracranial lymphatic vascular network (Castranova et al., 2021), a fully functional adult immune system, and adult regeneration processes that can only be imaged and studied in juveniles and adults.

While there has been significant progress in the use of adult zebrafish as research model, microscopic imaging of adult zebrafish and other adult aquatic vertebrates remains extremely challenging. Even if they are kept submerged, anesthetized adult zebrafish can only be imaged for a few tens of minutes before the animal dies, generally from lack of adequate oxygenation.

In terrestrial models, longer-term live imaging generally involves anesthesia with intubation to ensure that the animal remains oxygenated and viable during imaging. A previous report from Xu *et al.* described a method for intubating and holding adult zebrafish for live imaging on an upright microscope (Xu *et al.*, 2015), which was further adapted by Cox *et al.* (Cox *et al.*, 2018) to look at osteoblasts in regenerating scales. Here, we describe a redesigned method designed for inverted microscopes that includes a variety of powerful new features including easily replicated 3D printed imaging chambers, multiple levels of newly designed safety features to prevent water overflow onto microscope optics, tight control of temperature, and pulse dampening of inflow water to eliminate motion of the imaged sample. We also provide easy-to-use instructions for replicating our methods including downloadable, easily modifiable CAD designs for the 3D (three dimensional) printed imaging chambers and detailed user guides and instructions. We demonstrate the power and utility of our system by carrying out long-term imaging of neutrophil recruitment to wounds in adult zebrafish with transgenically labeled neutrophils and lymphatic vessels, including repeated intubation and imaging of the same fish over the course of a week. We also show that our intubation system can be used for aquatic species besides zebrafish by intubating and imaging Mexican Cavefish (*Astyanax mexicanus* – Pachon), demonstrating the broad usefulness and applicability of our methods for high-resolution long-term *in vivo* imaging of aquatic vertebrates.

## RESULTS

Previously, we reported methods for short-term and long-term imaging of developing zebrafish embryos and larvae (Kamei and Weinstein, 2005), but these methods are not suitable for imaging adult zebrafish. We have now designed a modified, improved chamber and associated “rig” for long-term time-lapse imaging of live adult zebrafish (**Fig 1**). The required equipment is compact and can easily be incorporated into any inverted microscopy workspace with minimal disruption (**Fig 1A**), and is easy to assemble (**Fig S1**). Intubation provides a continuous flow of oxygenated water through the gills of the fish (**Fig 1B-D**). The apparatus includes a custom-designed, 3D printed plastic chamber (**Fig 1E,F**, **intubation\_chamber.stl**, **96W\_Intubation\_chamber.stl**) that incorporates a variety of useful features, including a digital thermometer monitoring water temperature (**Fig S2**) and a single four-line peristaltic pump providing the necessary force for water flow through the single inflow and dual larger outflow tubes (**Fig 1B**), ensuring that inflow cannot exceed outflow (previous methods relied on use of multiple pumps, that could have differing flow rates or fail separately). We have also incorporated a pulse dampener (**Fig S3**) that reduces movement caused by peristaltic pump pulsation. The design also incorporates multiple additional safety features to protect expensive microscope systems including a water sensor (**Fig 1B,C**, **Fig S4**) connected to an emergency shut-off switch in case both of the redundant dual outflow tubes clog (**Fig 1B,C**), and an emergency overflow tube (**Fig 1B**) to shuttle excess liquid away and prevent chamber overflow if all else fails.

The schematic diagram in **Fig 2A** provides an overview of the components of the intubation rig (**Table S1**) and how they are all assembled, while **Figs 2B,C** show details of the specific

arrangement of components in and connected to the imaging chamber, and **Fig S1** provides a detailed, step-by-step guide to assembly. The commercially available chambered coverglass (Lab Tek II Imaging Dish, **Table S1**) is secured to the printed intubation chamber using silicone grease as shown in **Fig 2A** and **Fig S1**. As shown in these schematics, the various parts are easily assembled to form the working unit without a great deal of technical knowledge (**Fig S1**). We have provided two different versions of the chamber design, one designed to fit on our Tokei Hit heated stage (**Fig 1E**), and one with four supports extending out from the base of the chamber body designed to fit in a stage designed to hold 96-well plates (**Fig 1F**). We chose the 96 well format because there are several microscope and stage companies that manufacture stages or inserts designed to fit the 96 well plate dimensions. We designed the chamber to fit on the heated stages we had on our microscopes, but because we use a heat block to warm the water before it enters the chamber a heated stage is not required. Our design can be modified to fit other imaging systems using the computer aided design (CAD) software files that we provide (**intubation\_chamber.stl**, **96W\_Intubation\_chamber.stl**). The length of the four stage supports can be modified using Google Sketchup or other widely available CAD software to fit on many different microscope stages from a variety of microscope manufacturers. The designs can be 3D printed using commercially available printing services (e.g., Xometry; **Table S1**). The rest of the intubation rig components including the tubing, water sensor, pumps, water bath, and thermometer are also commercially available (**Table S1**). This intubation rig is simple to replicate and cost effective.

To demonstrate that anesthetized, intubated adult fish can survive for an extended time period in the chamber, we carried out a total of 26 runs on individual adult fish for at least 20 hours, with a survival rate of 77% (20/26), a level similar to that observed in long-term time-lapse imaging experiments of comparable time length performed on zebrafish larvae (unpublished observations). We also completed 6 shorter runs (3.5 hours) and had 100% survival. To maximize survival we have provided a “tips and tricks” section at the end of our step-by-step assembly guide (**Fig. S1**).

To demonstrate the utility of this intubation set-up for high resolution long-term confocal imaging of living adult zebrafish, we performed time-lapse imaging of neutrophil recruitment to a wound site in an adult zebrafish with transgenically labeled neutrophils and lymphatic vessels. We made a small wound on the side of an adult *Tg(Iyz:DsRed2)<sup>NZ50</sup>;Tg(mrc1a:eGFP)<sup>y251</sup>* double transgenic, *casper* mutant zebrafish. This line has red fluorescent neutrophils and green fluorescent lymphatic vessels (**Fig 3A**), and the use of the pigment-free *casper* (*roy*, *nacre* double mutant (White et al., 2008)) background provides improved tissue clarity for adult imaging. The endogenous blue autofluorescence of the scales allowed us to visualize where they were removed by wounding (**Fig 3B**). Over the course of nearly day-long time-lapse imaging of living adult zebrafish, we were able to image neutrophils moving into and accumulating in the wound area (**Fig 3C-J**, **Movie 1**). Interestingly, significantly increased neutrophil recruitment to the wound area does not begin until two to three hours post injury (**Fig 3D,H**, **Movie 1**), which is much longer than an anesthetized zebrafish without intubation can survive, making intubation essential for studying this interesting process. By using a 20X long-working distance objective, we were able to acquire high-magnification, high resolution

images of highly active migratory neutrophils moving around and through lymphatic vessels close to the wound site (**Fig 3K-N, Movie 1**).

We conducted additional experiments to examine whether overnight intubation of *Tg(lyz:DsRed2)<sup>NZ50</sup>, Tg(mrc1a:eGFP)<sup>y251</sup>* double transgenic, *casper* mutant fish adult fish with or without overnight confocal imaging inhibits neutrophil recruitment after wounding, or if intubation and imaging promotes neutrophil recruitment even in the absence of wounding (**Fig. S5**). We found no statistically significant difference in neutrophil recruitment to wounds overnight regardless of whether or not the fish was intubated with or without continuous overnight imaging of the wounded area (**Fig. S5C-E,H-J,K**; compare conditions iii, iv, and v). We also saw no statistically appreciable enhancement of neutrophil recruitment in unwounded animals promoted by intubation, in either the presence or absence of continuous overnight imaging (**Fig. S5A,B,F,G,K**; conditions i and ii). These results suggest the experimental methods we are using for intubation and for continuous overnight confocal imaging do not themselves have appreciable effects on neutrophil recruitment. However, we cannot exclude the possibility that prolonged intubation and imaging may cause other physiological changes within the fish, and appropriate controls must always be included depending on the process being studied.

To determine whether our methods can be used for repeated anesthetization, intubation, and imaging of the same fish on multiple days, we introduced a cutaneous wound on a *Tg(lyz:DsRed2)<sup>NZ50</sup>, Tg(mrc1a:eGFP)<sup>y251</sup>* double transgenic, *casper* mutant fish as above then repeatedly intubated and carried out time-lapse confocal imaging on the same fish for 3.5 hours at 0, 1, 2, and 7 days post-wounding (**Fig 4, Movie 2**). Neutrophils began to migrate to the wound in the first 3.5 hours (**Fig 4C-E**), and large numbers of highly active neutrophils were observed at the wound site at 1 and 2 days post wound (**Fig 4 F-K**). By 7 days post injury the numbers of neutrophils were strongly reduced, to approximately baseline levels, and the few neutrophils that remained were quiescent (**Movie 2**), but we observed overgrowth of *mrc1a*-positive lymphatic vessels into the wound area (**Fig 4 L-N**).

To further validate the broad utility of our intubation system, we also intubated and imaged a six-month-old Mexican Cavefish (*Astyanax mexicanus* – pachón) for 3.5 hours (**Fig S6, Movie 3**), demonstrating that we can use 405 nm autofluorescence to acquire highly detailed images of bony elements in the face, trunk and scales of the cavefish (**Fig S6C,D,F,H**). We also showed that we could clearly image robust blood flow through blood vessels of the intubated animal using transmitted light (**Fig S6E,G, Movie 3**).

## DISCUSSION

We have developed a new intubation technique that permits long-term and high resolution imaging of adult zebrafish and cavefish on inverted microscopes and have provided detailed information, including 3D CAD files for custom printing an imaging chamber, that will allow other laboratories to easily reproduce our methods. The steadiness and reproducible positioning of the microscope field captured in these high-magnification images (**Movie 1,2,3**) shows that animals intubated and mounted for imaging using this method are extremely stable

and that long-term continuous imaging can be performed even at very high optical resolution, followed by fish revival and recovery (**Movie 4**). Together, our time-lapse images show that this intubation rig is useful both for large field of view imaging (**Fig 3C-J, Movie 1**) such as visualizing neutrophil trafficking and migration at large scale (**Movie 1**) as well as for much higher magnification imaging for the visualization and tracking of the precise movements and morphologies of individual cells (**Fig 3K-N, Movie 1**).

Using pigment free *casper* fish was important to this work because although blood vessels in the scales can be imaged, imaging any structures below the skin becomes very difficult with normally pigmented fish. Researchers using *casper* fish should be aware that there may be physiological differences between *casper* fish and wild-type fish, as has been demonstrated in the hair cells in the lateral line (Holmgren and Sheets, 2021). It is also important to note once again that while we have shown neutrophil recruitment is not appreciably affected by overnight intubation and imaging, prolonged intubation and imaging may cause other physiological changes within the fish, and appropriate controls must always be included depending on the process being studied.

This study documents an easy to implement, easy to use, highly effective system for long-term time-lapse imaging of intubated adult zebrafish and cavefish on an inverted microscope. This new system will make it possible to use high-resolution time-lapse optical imaging to study tissue regeneration in the fin, immune responses to injury, cancer metastasis, cellular trafficking through newly described intracranial lymphatic vessels, and other important processes taking place in adult zebrafish. In addition to being designed for widely used inverted microscope configurations, the design also incorporates many additional useful new attributes including precise temperature control, multiple water overflow safety prevention features, and an easily replicated and modified 3D printed imaging chamber. The downloadable plans for this imaging chamber can easily be modified and adapted to create chambers to fit any commercial microscope stage. With ever-increasing use of the adult zebrafish as a model for studying disease, regeneration, and neurobiology, and other topics, this imaging “rig” will become an increasingly vital tool for long-term imaging of key events in adult fish.

## MATERIALS AND METHODS

### Construction of the Intubation and Imaging Chamber

A 3D printable plastic chamber was designed that would hold a glass-bottomed chambered coverglass, allow inflow and outflow tubing to enter and exit, hold a water sensor and an overflow tube, and fit on our existing Tokei Hit heated microscope stage (Model: INUB-TIZB; **Fig 1E**). A second version of the chamber was also designed to fit on any stage designed to accept a 96 well plate (example: Tokei Hit Model: STZF-TIZWX-SET), with four supporting arms which can be quickly adjusted in CAD software to fit any other microscope stage (**Fig 1F**). 3D models for the printable plastic chambers were designed using Google SketchUp Pro and these CAD designs are included as supplements (**intubation\_chamber.stl**, **96W\_Intubation\_chamber.stl**). They can be downloaded and used to print the imaging chambers described above. These CAD designs are easily modified to create chambers to fit other microscope

stages. Chambers can be printed in-house if 3D printing is available, or there are many “print and ship” options available. The material used for printing must be watertight and inert. Our chambers were printed out of Nylon 12 by Xometry™ (xometry.com) using Selective Laser Sintering (SLS).

A single-well chambered coverglass (Lab-TekII #155360) is placed into the opening in the bottom of the 3D printed chamber by placing a small bead of silicone grease (SG-ONE™ 24708) around the outer edge of the chambered coverglass using a 12cc syringe and pressing it firmly in place (**Fig 2A, FigS1**). The 3D printed chamber should be filled with water to test for leaks in the seal before use. Care should be taken to use only enough grease to create a water-tight seal. Excess grease can get on the bottom of the coverglass or worse, on the objective lens of the microscope.

### Water Flow

One liter of aquarium system water with 126 mg/L tricaine (Tricaine – S by Syndel ver. 121718, buffered to pH 7 with 1M Tris pH9) is placed in a bottle with an air stone inside to aerate the system water. A four-channel peristaltic pump (World Precision Instruments Peri-Star™ Pro Cat# PERIPRO -4L) is used to pump the aquarium system water through silicone tubing (Tygon) which is wrapped around a heat block (SH100 Mini Dry Bath Hot Block) to warm the water before it goes through the inflow hole in the 3D printed chamber (**Fig 2D**). Wrapping the tygon tubing around the heat block six times and setting the heat block to 57°C produced a water temperature between 24 and 28°C (**Fig S2**) inside the chambered coverglass. The tube is held to the bottom of the chambered coverglass using modeling clay (**Fig 2B,C**). A small piece of tubing is placed in the end of the outflow tube, small enough to fit in the fish’s mouth (**Fig 2C**). Setting the peristaltic pump at 15 rotations per minute provides a flow rate of 6 ml per minute through the chambered coverglass but flow rate should be measured and adjusted for each rig. Depending on the imaging being done, the peristaltic pump creates a pulsatile flow which can may cause excessive movement. To prevent pulsatile movement related to the peristaltic pump, a pulse dampener, either commercially available or self-made (**Fig S3**), is placed in-line before the heat block. Two outflow tubes are connected to the same peristaltic pump and draw water out of the chambered coverglass and back into the bottle (**Fig 2D**). These tubes go through the two specially designed holes in the 3D printed chamber and attach to elbow fittings and another small length of tube (**Fig 2B,C**). The height that these outflow tubes are placed will determine the water level inside the chambered coverglass and should be set so that the fish is completely submerged but the chambered coverglass does not overflow (**Fig 2C**). The temperature of the water flowing through the imaging chamber was measured using a digital thermometer (Fisherbrand Traceable thermometer cat# 15-081-111) and maintained between 24-28° C by adjusting the temperature of the heat block (**Fig. S2**). A detailed, step-by-step set up guide for our intubation system is provided in **Fig. S1**.

### Overflow Prevention Safety Features

Overflow of water onto the microscope would be catastrophic, so we developed several features to prevent it. First, there is one small diameter tube (in the fish's mouth) bringing water into the chambered coverglass but two redundant larger diameter tubes removing water so even if one tube becomes clogged the inflow rate will still not exceed the outflow rate. Second, we incorporated an automatic electronic water overflow cut-off switch. We placed a WasherWatcher Laundry Tub Overflow Protector (Overflow Protector) (HydroCheck, STAK Enterprises Inc.) into a sensor holder designed into the 3D printed chamber (cut to fit) (**Fig. 1B**). This product is not always available, so we also modified a Water Watcher Leak Detector Alarm (HydroCheck, STAK Enterprises Inc.) with modification details shown in **Fig S4**. The Overflow Protector is plugged into an outlet, and the peristaltic pump is plugged into the Overflow Protector. In the event water overflows the chambered coverglass and enters the 3D printed chamber, the water sensor will detect it and cut the power to the peristaltic pump, preventing additional water entering the chamber. Third, we designed a last-resort emergency overflow outlet from the chamber to prevent water overflowing the chamber if all else fails. A large hole in the upper part of the 3D printed chamber (**Fig 1E,F**) accepts a fitting held in place by a greased (silicone grease) "O" ring attached to a large-diameter tube leading to an empty 1L bottle (**Fig 1B** and **Fig 2B**). If the other leak prevention measures fail and water reaches the large overflow hole, water will be drained safely away from the microscope and into the empty bottle.

### Fish Preparation

Adult *casper* double transgenic zebrafish,  $Tg(lyz:DsRed2)^{NZ50};Tg(mrc1a:eGFP)^{y251}$  between 6 and 18 months, not fed on the day of the intubation, were anesthetized in 168 mg/L buffered tricaine (note 25% higher than what circulates in the chamber) in system water. A small wound was made around the trunk mid-line above the anal fin using a 4 mm dissecting knife (Fine Science Tools # 10055-12). A few scales were removed by scraping the tip of the knife along the side of the fish from dorsal to ventral, gentle scraping was continued until minor damage to the skin was done, causing a very small amount of blood to be seen around the wound site. The fish was then placed into the chambered coverglass inside the 3D printed chamber with the wound side facing down. The chamber was placed on the stage of a nearby stereo microscope, then using two pairs of forceps, one to manipulate the intubation tube (blunt forceps) and one to manipulate the fish (soft tip tweezers, Exceltra 162DRT Cat# 18-100-921), the intubation tube was carefully placed into the fish's mouth (**Movie 4**). Turning off the peristaltic pump is helpful while placing the tube inside the fish's mouth. To prevent movement during image acquisition a sponge cut to fit inside the chambered coverglass was gently placed on top of the fish (**Fig 2B,C**). If additional stabilization for higher magnification imaging is needed, stabilizing weights were used instead of a sponge. Stabilizing weights were made by cutting a finger off of a nitrile glove, filling it with glass beads (425-600 um Sigma G8772) and tying it off so the beads do not escape. If the fish being intubated needs to be revived after intubation, we found that replacing the tricaine water with system water and letting it run through the rig for 10 to 15 minutes until the fish begins to move was the best way to recover fish.



## Fish Husbandry and Fish Strains

Fish were housed in a large zebrafish dedicated recirculating aquaculture facility (4 separate 22,000L systems) in 6L and 1.8L tanks. Fry were fed rotifers and adults were fed Gemma Micro 300 (Skretting) once per day. Water quality parameters were routinely measured and appropriate measures were taken to maintain water quality stability (water quality data available upon request). The following transgenic fish lines were used for this study: *Tg(mrc1a:eGFP)<sup>y251</sup>* (Jung et al., 2017), and *Tg(lyz:DsRed2)<sup>NZ50</sup>* (Hall et al., 2007). Fish were maintained and imaged in a *casper* (*roy<sup>ag</sup>* (Ren et al., 2002), *nacre<sup>w1</sup>* (Lister et al., 1999) double mutant (White et al., 2008)) genetic background in order to increase clarity for visualization by eliminating melanocyte and iridophore cell populations from distorting images. Cavefish are maintained on a recirculating water system with 14/10 light cycle in groups of 16-20 fish per tank. Adult cavefish are fed Gemma 500 and frozen brine shrimp. This study was performed in an AAALAC accredited facility under an active research project overseen by the NICHD ACUC, Animal Study Proposal # 18-015 for zebrafish and 18-016 for cavefish.

## Image Acquisition

Confocal images of lymphatics and neutrophils were acquired using a Nikon Ti2 inverted microscope with Yokogawa CSU-W1 spinning disk confocal, Hamamatsu Orca Flash 4 v3 camera with the following Nikon objectives: 2X Air 0.1 NA, 4X Air 0.2 N.A., 10X Air 0.45 N.A., 20X Air 0.7 N.A. Transmitted light images and movies of cavefish blood flow (**Fig S6E,G and Movie 3**) required a very bright transmitted light source to penetrate through the fish, we used the Sola Lumencore Light Engine®. Stereo microscope pictures were taken using a Leica M165 microscope with Leica DFC 7000T camera. In addition to acquiring *Tg(mrc1a:eGFP)<sup>y251</sup>* expressing lymphatics with a 488 nm excitation laser and *Tg(lyz:DsRed2)<sup>NZ50</sup>* with a 561 nm laser, we also acquired autofluorescence in the scales using 405 nm excitation laser and used these images to delineate the wound area. Video of the chamber on the inverted microscope, and fish swimming portions of **Movie 1, 3, and 4** were taken with an iPhone XR. Pictures in **Fig S1** were taken using a Sony  $\alpha$  6400 mirrorless camera.

## Image Processing and statistics

Images were processed using Nikon Elements. Maximum intensity projections of confocal stacks are shown. Time-lapse movies were made using Nikon Elements and exported to Adobe Premiere Pro CC 2019. Adobe Premiere Pro CC 2019 and Adobe Photoshop CC 2019 were used to add labels and arrows to movies. Schematics were made using Adobe Photoshop CC 2019, Microsoft PowerPoint, and Bio Render software.

Neutrophil coverage area (**Fig 4**) was measured on maximum intensity projections of 2X tiled confocal stacks using Nikon Elements General Analysis 3 software. Regions of interest of the same area were selected, and calculated at the start and end of the intubation session using the same threshold. The change in control area was calculated by subtracting the neutrophil area coverage at the beginning of intubation from coverage at the end of the intubation. Because

the wound area had less neutrophils than the control area, to prevent an over estimation of change in neutrophil coverage area, we subtracted the wound area at the end of intubation from the control area at the beginning of intubation.

We compared the mean change in neutrophil coverage areas of the wound to the control areas using a two tailed T-test assuming unequal variances and used the Holm-Bonferroni method to counteract the problem of multiple tests (Holm, 1979). We used GraphPad Prism 9 and Microsoft Excel to compile data, run statistics and create the plot (**Fig S5K**).

### **Intubation system maintenance**

After each use the intubation system should be cleaned by running a 1:10 bleach solution through the system for at least 10 minutes followed by at least two flushes of tap water to remove any residual bleach. The tube sections that are used in the peristaltic pump become worn out quickly and should be replaced between uses. All of the tubing needs to be replaced occasionally, especially if any mold, mildew, or bacterial growth is seen. The chambered coverglass can be cleaned with 70% ethanol between uses but also needs to be replaced when it can no longer be effectively cleaned.

### **ACKNOWLEDGEMENTS**

The authors would like to thank members of the Weinstein laboratory for their critical comments on this manuscript. The Authors would also like to thank the Research Animal Branch of the *Eunice Kennedy Shriver* National Institute of Child Health and Human Development as well as the Charles River Staff for excellent animal care and husbandry.

### **SOURCES OF FUNDING**

This work was supported by the intramural program of the Eunice Kennedy Shriver National Institute of Child Health and Human Development, National Institutes of Health (ZIA-HD008915, ZIA-HD008808, and ZIA-HD001011, to BMW).

### **COMPETING INTERESTS**

None.

### **AUTHOR CONTRIBUTIONS**

DC, BS, MVG, AVG and BMW designed experiments and developed the research ideas. DC, AG, and JP performed the experiments. DC, BS, and BMW wrote the paper.

## REFERENCES

- Castranova, D., Samasa, B., Venero Galanternik, M., Jung, H. M., Pham, V. N. and Weinstein, B. M.** (2021). Live Imaging of Intracranial Lymphatics in the Zebrafish. *Circ Res* **128**, 42-58.
- Cox, B. D., De Simone, A., Tornini, V. A., Singh, S. P., Di Talia, S. and Poss, K. D.** (2018). In Toto Imaging of Dynamic Osteoblast Behaviors in Regenerating Skeletal Bone. *Curr Biol* **28**, 3937-3947 e3934.
- Driever, W., Solnica-Krezel, L., Schier, A. F., Neuhauss, S. C., Malicki, J., Stemple, D. L., Stainier, D. Y., Zwartkruis, F., Abdelilah, S., Rangini, Z., et al.** (1996). A genetic screen for mutations affecting embryogenesis in zebrafish. *Development* **123**, 37-46.
- Fazio, M., Ablain, J., Chuan, Y., Langenau, D. M. and Zon, L. I.** (2020). Zebrafish patient avatars in cancer biology and precision cancer therapy. *Nat Rev Cancer* **20**, 263-273.
- Frantz, W. T. and Ceol, C. J.** (2020). From Tank to Treatment: Modeling Melanoma in Zebrafish. *Cells* **9**.
- Hall, C., Flores, M. V., Storm, T., Crosier, K. and Crosier, P.** (2007). The zebrafish lysozyme C promoter drives myeloid-specific expression in transgenic fish. *BMC Dev Biol* **7**, 42.
- Holm, S.** (1979). A Simple Sequentially Rejective Multiple Test Procedure. *Scand J Stat* **6**, 65-70.
- Holmgren, M. and Sheets, L.** (2021). Influence of Mpv17 on Hair-Cell Mitochondrial Homeostasis, Synapse Integrity, and Vulnerability to Damage in the Zebrafish Lateral Line. *Front Cell Neurosci* **15**, 693375.
- Hwang, W. Y., Fu, Y., Reyon, D., Maeder, M. L., Tsai, S. Q., Sander, J. D., Peterson, R. T., Yeh, J. R. and Joung, J. K.** (2013). Efficient genome editing in zebrafish using a CRISPR-Cas system. *Nat Biotechnol* **31**, 227-229.
- Johnson, S. L. and Weston, J. A.** (1995). Temperature-sensitive mutations that cause stage-specific defects in Zebrafish fin regeneration. *Genetics* **141**, 1583-1595.
- Jung, H. M., Castranova, D., Swift, M. R., Pham, V. N., Venero Galanternik, M., Isogai, S., Butler, M. G., Mulligan, T. S. and Weinstein, B. M.** (2017). Development of the larval lymphatic system in zebrafish. *Development* **144**, 2070-2081.
- Kamei, M. and Weinstein, B. M.** (2005). Long-term time-lapse fluorescence imaging of developing zebrafish. *Zebrafish* **2**, 113-123.
- Kaufman, C. K., Mosimann, C., Fan, Z. P., Yang, S., Thomas, A. J., Ablain, J., Tan, J. L., Fogley, R. D., van Rooijen, E., Hagedorn, E. J., et al.** (2016). A zebrafish melanoma model reveals emergence of neural crest identity during melanoma initiation. *Science* **351**, aad2197.
- Lawson, N. D. and Weinstein, B. M.** (2002). In vivo imaging of embryonic vascular development using transgenic zebrafish. *Dev Biol* **248**, 307-318.

- Lister, J. A., Robertson, C. P., Lepage, T., Johnson, S. L. and Raible, D. W.** (1999). *nacre* encodes a zebrafish microphthalmia-related protein that regulates neural-crest-derived pigment cell fate. *Development* **126**, 3757-3767.
- Mullins, M. C., Hammerschmidt, M., Haffter, P. and Nusslein-Volhard, C.** (1994). Large-scale mutagenesis in the zebrafish: in search of genes controlling development in a vertebrate. *Curr Biol* **4**, 189-202.
- Nasevicius, A. and Ekker, S. C.** (2000). Effective targeted gene 'knockdown' in zebrafish. *Nat Genet* **26**, 216-220.
- Ober, E. A., Field, H. A. and Stainier, D. Y.** (2003). From endoderm formation to liver and pancreas development in zebrafish. *Mech Dev* **120**, 5-18.
- Oka, T., Nishimura, Y., Zang, L., Hirano, M., Shimada, Y., Wang, Z., Umemoto, N., Kuroyanagi, J., Nishimura, N. and Tanaka, T.** (2010). Diet-induced obesity in zebrafish shares common pathophysiological pathways with mammalian obesity. *BMC Physiol* **10**, 21.
- Patton, E. E. and Zon, L. I.** (2001). The art and design of genetic screens: zebrafish. *Nat Rev Genet* **2**, 956-966.
- Poss, K. D., Wilson, L. G. and Keating, M. T.** (2002). Heart regeneration in zebrafish. *Science* **298**, 2188-2190.
- Ren, J. Q., McCarthy, W. R., Zhang, H., Adolph, A. R. and Li, L.** (2002). Behavioral visual responses of wild-type and hypopigmented zebrafish. *Vision Res* **42**, 293-299.
- Scheer, N. and Campos-Ortega, J. A.** (1999). Use of the Gal4-UAS technique for targeted gene expression in the zebrafish. *Mech Dev* **80**, 153-158.
- White, R. M., Sessa, A., Burke, C., Bowman, T., LeBlanc, J., Ceol, C., Bourque, C., Dovey, M., Goessling, W., Burns, C. E., et al.** (2008). Transparent adult zebrafish as a tool for in vivo transplantation analysis. *Cell Stem Cell* **2**, 183-189.
- Wyart, C. and Del Bene, F.** (2011). Let there be light: zebrafish neurobiology and the optogenetic revolution. *Rev Neurosci* **22**, 121-130.
- Wyart, C., Del Bene, F., Warp, E., Scott, E. K., Trauner, D., Baier, H. and Isacoff, E. Y.** (2009). Optogenetic dissection of a behavioural module in the vertebrate spinal cord. *Nature* **461**, 407-410.
- Xu, C., Volkery, S. and Siekmann, A. F.** (2015). Intubation-based anesthesia for long-term time-lapse imaging of adult zebrafish. *Nat Protoc* **10**, 2064-2073.
- Yan, C., Brunson, D. C., Tang, Q., Do, D., Iftimia, N. A., Moore, J. C., Hayes, M. N., Welker, A. M., Garcia, E. G., Dubash, T. D., et al.** (2019). Visualizing Engrafted Human Cancer and Therapy Responses in Immunodeficient Zebrafish. *Cell* **177**, 1903-1914 e1914.
- Yaniv, K., Isogai, S., Castranova, D., Dye, L., Hitomi, J. and Weinstein, B. M.** (2006). Live imaging of lymphatic development in the zebrafish. *Nat Med* **12**, 711-716.

## Figures

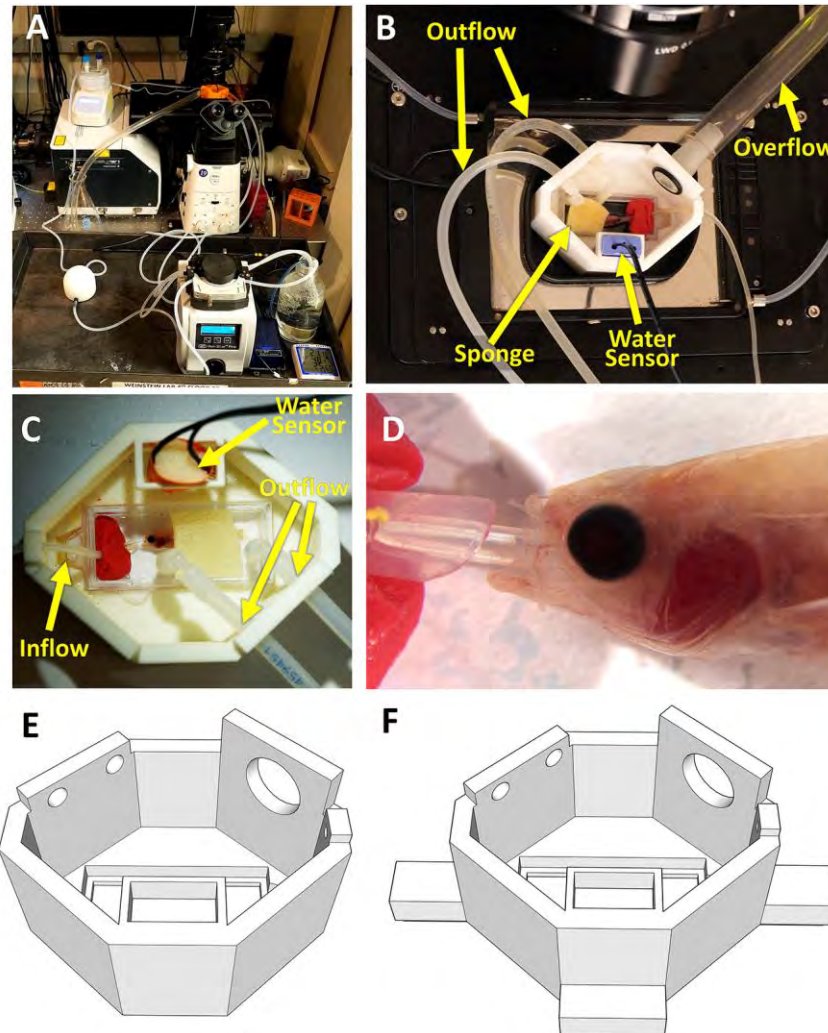

**Figure 1. Intubation of an adult fish on an inverted microscope.** A-D. Photographs of long-term imaging of an Intubated adult zebrafish inside custom 3D printed chamber. **A.** Overview photograph of an intubation rig set up on an inverted microscope. **B.** Photograph of the intubation/imaging chamber set up on a microscope stage, showing inflow tube, dual outflow tubes, overflow tube, water sensor, and sponge holding fish in place. **C.** Close-up photograph of the chamber with an intubated fish, with inflow tube, dual outflow tubes, and water sensor noted. **D.** Higher magnification image of the intubated fish. **E,F.** 3D renderings of intubation chambers designed to fit on (**E**) a Tokai Hit heated stage (Model: INUB-TIZB) or (**F**) in a 96 well plate holder on a Tokai Hit heated stage (Model: STZF-TIZWX-SET) or any other stage designed to hold 96 well plates.

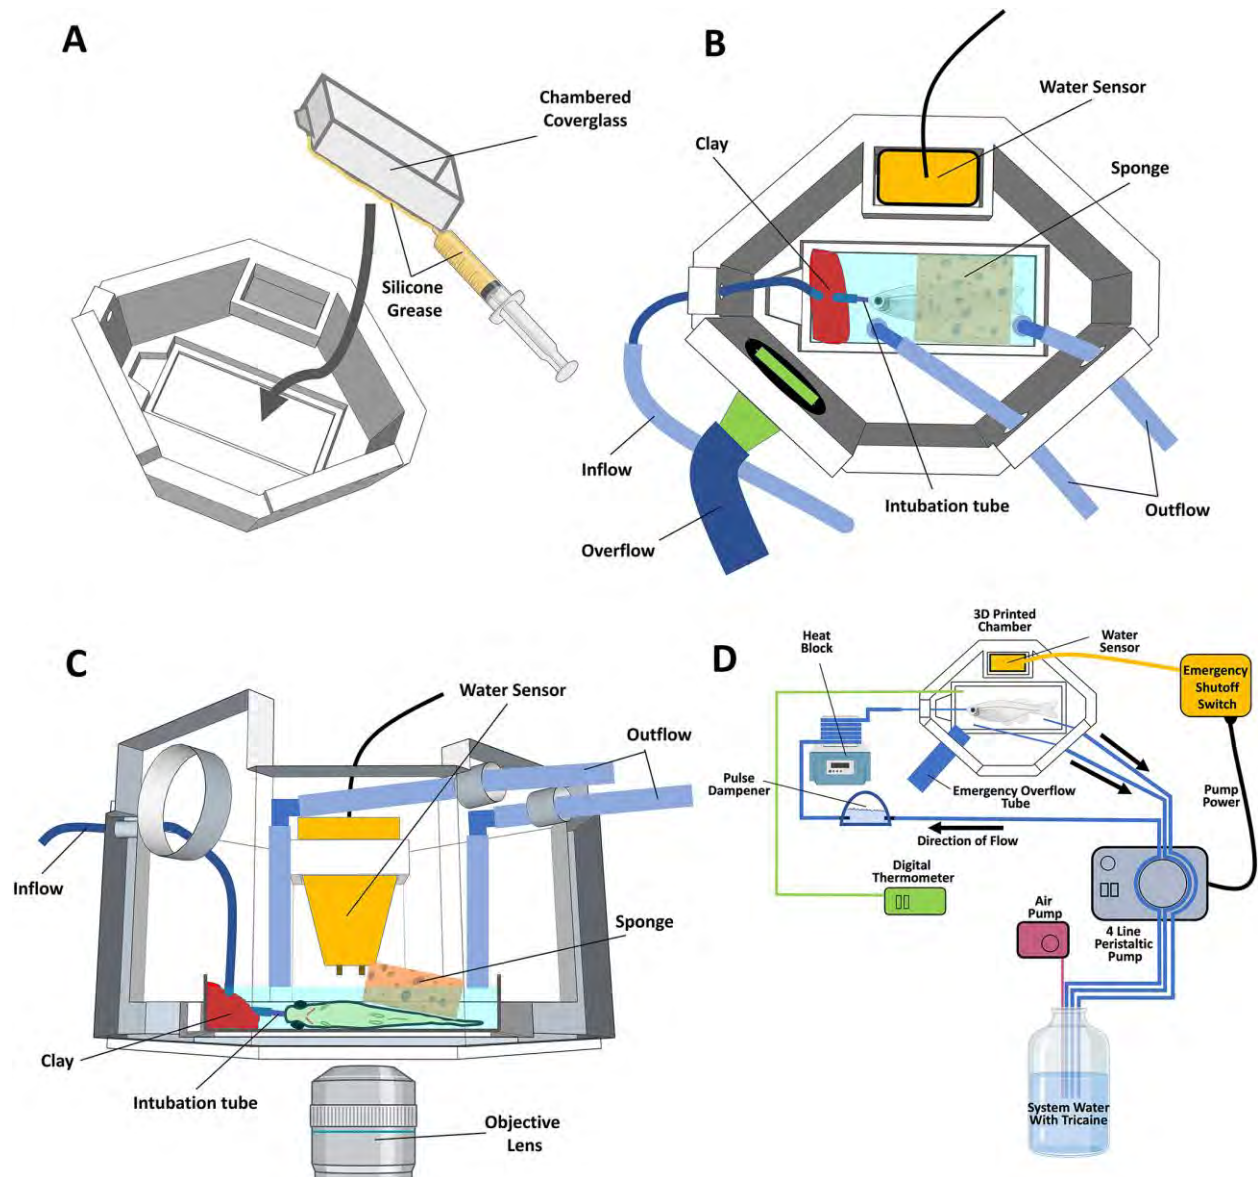

**Figure 2.** Schematic diagrams of zebrafish intubation. **A.** Schematic diagram showing attachment of a chambered coverglass into the 3D printed chamber, using silicone grease to provide a watertight seal. **B.** Schematic diagram showing a top view of the intubation chamber. **C.** Schematic diagram showing a side view of the intubation chamber. **D.** Schematic diagram providing an overview of the arrangement and interconnection of components for fish intubation.

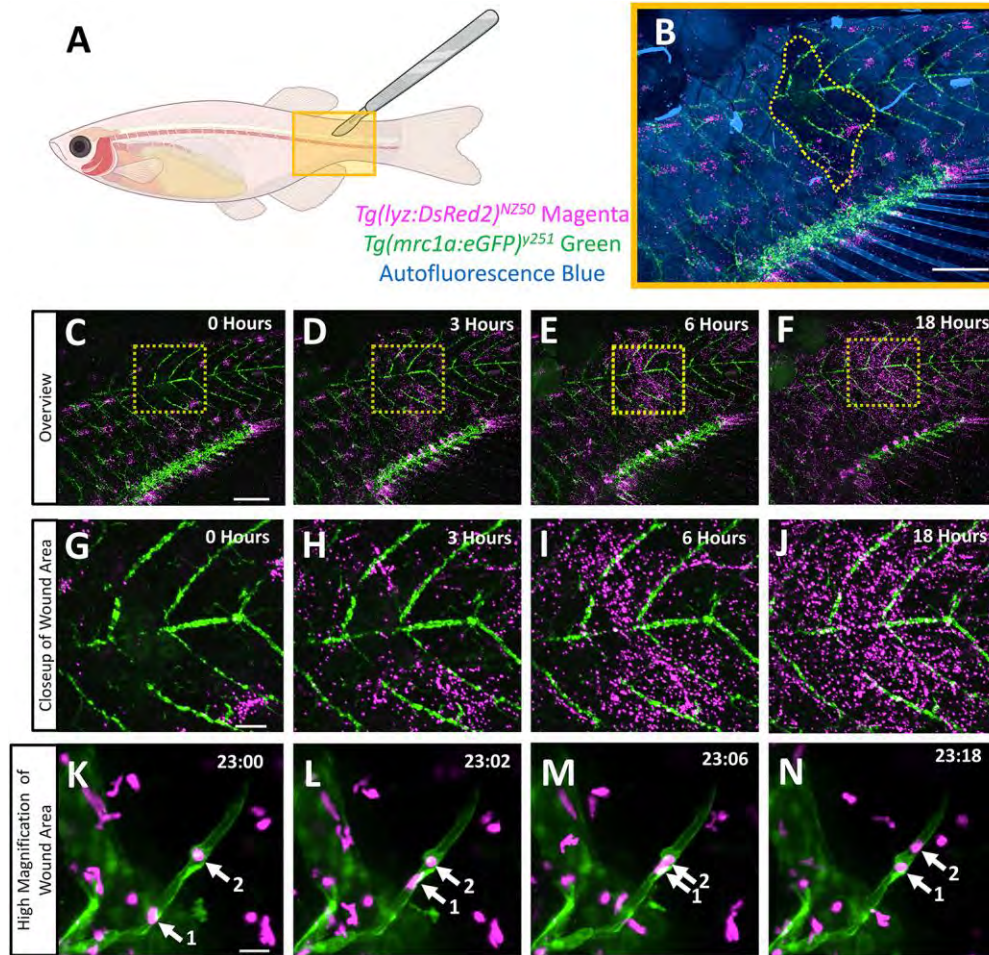

**Figure 3. Long-term time-lapse imaging of neutrophil recruitment to a scale removal wound in an intubated adult zebrafish.** **A.** Schematic diagram of an adult *casper* *Tg(lyz:DsRed2)<sup>NZ50</sup>*, *Tg(mrc1a:eGFP)<sup>y251</sup>* double transgenic zebrafish with fluorescent neutrophils (magenta) and lymphatic vessels (green), as well as autofluorescent scales (blue). The approximate site of scale removal by abrasion with a scalpel is noted with a yellow box. **B.** An overview image of the wound area (yellow box in A) at the start of time-lapse imaging. The yellow dashed line notes the boundary of the site where autofluorescent blue scales were removed. **C-N.** Maximum intensity projection still images from long-term time-lapse confocal imaging of the adult fish in (B). **C-F,** Overview confocal images of the trunk at 0 (C), 3 (D), 6 (E), and 18 (F) hours. **G-J.** Close-up images of the boxed regions in panels C-F. **K-L.** High-magnification images of neutrophils (magenta) actively migrating in and around lymphatic vessels (green) in the recovering wound site of a live adult zebrafish after 23:00 (K), 23:02 (L), 23:06 (M), and 23:18 (N) of time-lapse imaging (hours:minutes). See **Movie 1** for the full time-lapse sequences including the images in panels C-N. Arrows note two neutrophils migrating inside a lymphatic vessel. Scale bars = 1 mm (B-F), 250  $\mu$ m (G-J), 25  $\mu$ m (K-N).

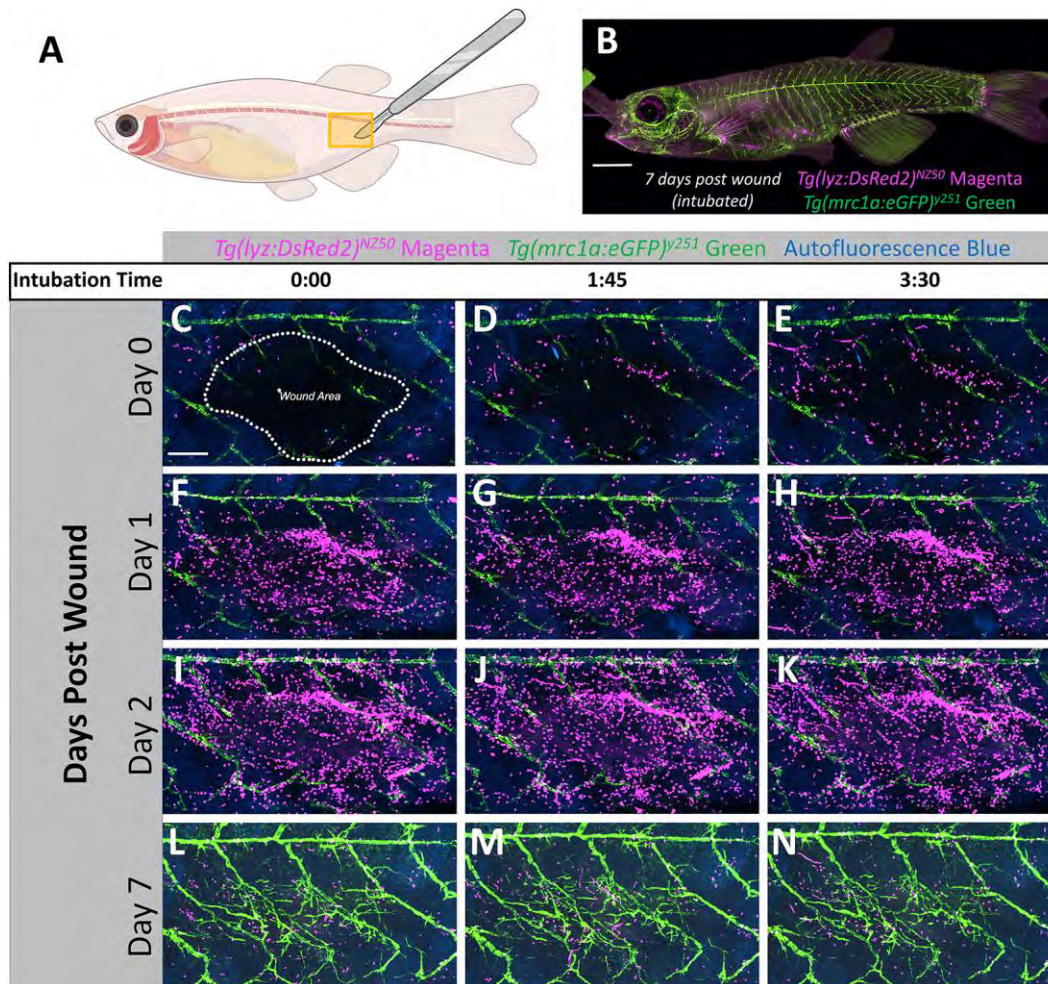

**Figure 4. Repeated Intubation and Imaging of a small wound.** **A.** Schematic diagram of an adult *casper*  $Tg(lyz:DsRed2)^{N250}$ ,  $Tg(mrc1a:eGFP)^{y251}$  double transgenic zebrafish with fluorescent neutrophils (magenta) and lymphatic vessels (green), as well as autofluorescent scales (blue). The approximate site of scale removal by abrasion with a scalpel is noted with a yellow box. **B.** An overview image of the intubated fish 7 days post wound. **C-N.** Confocal images taken at the beginning (0:00) halfway through (1:45) and at the end of a three-and-a-half-hour intubation that was repeated four times, day 0,1,2, and 7. Outline of the wound area shown in dotted line in (C). Scale bar = 2.5 mm (B), 500  $\mu$ m (C). See **Movie 2** for full time-lapse sequences.



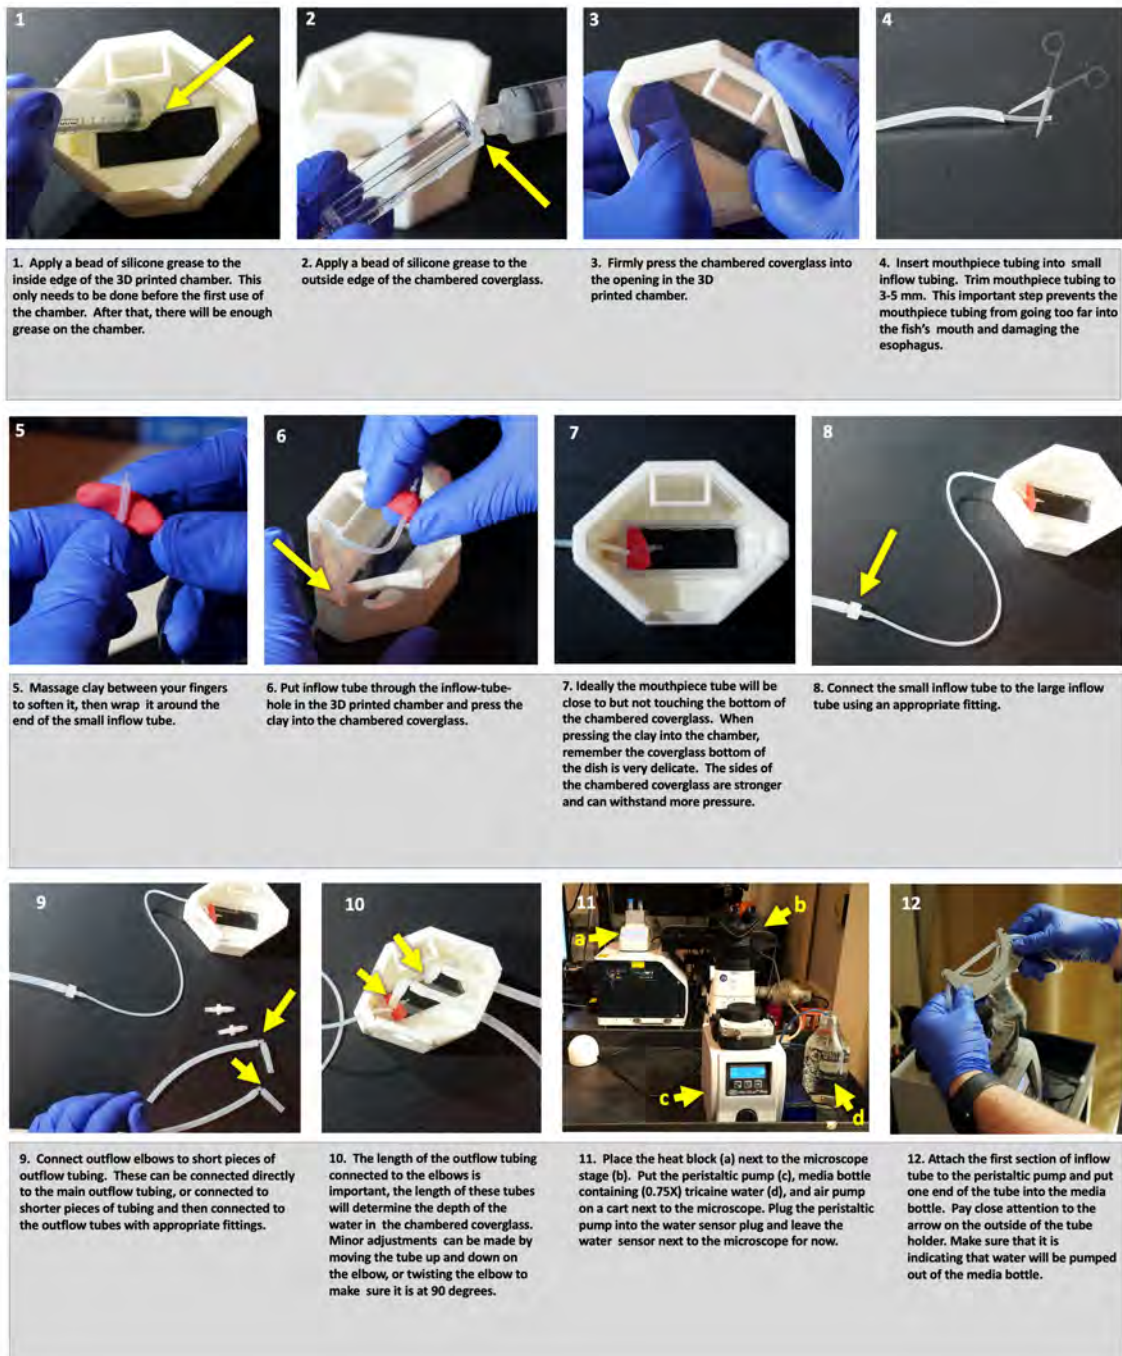

Fig S1a. Intubation Setup Instructions Part 1

**13.** Attach the other end of the first section of inflow tube to the pulse dampener. Attach the next section of inflow tube to the pulse dampener. This is the tube that leads to the mouthpiece tube. Make sure this tube is long enough because it will need to be wrapped several times around the heat block.

**14.** Attach both outflow tubes to the opposite side of the peristaltic pump as the inflow tubes and place the ends into the media bottle.

**15.** Turn on the peristaltic pump. It will take a few minutes for water to work its way through the tubes and for enough pressure to build in the pulse dampener.

**16.** Let water run through the chamber for a couple of minutes then shut off the pump and prepare to mount. Pressure in the pulse dampener will continue to push water through the system for a little while. Keep an eye on the chambered coverglass to make sure that it doesn't overflow.

**17.** Move the imaging chamber to a nearby stereo microscope with adequate working distance to comfortably fit the chamber and allow you to manipulate tubes and the fish. If your system does not have adequate working distance, a lower magnification objective (0.5x) might be needed.

**18.** Anesthetize the fish you will be imaging in 1X (160 mg/L) Tricaine. Once anesthetized, transfer the fish to the chambered coverglass. Using fine forceps to manipulate the mouthpiece tube and plastic tweezers to gently maneuver the fish, holding it by the pectoral fin, use the mouthpiece tube to open the fish's mouth and gently insert the tube.

**19.** Moisten a sponge in tricaine water that has been cut to fit into the chambered coverglass and gently place it on top of the fish. Place both outflow tubes into the chambered coverglass and make sure they are at a level that the fish will stay covered with water but the chambered coverglass won't overflow. Turn on the peristaltic pump while the chamber is still on the stereo microscope and make sure the mouthpiece stays in the fish's mouth and the outflow tubes are working properly.

**20.** Place the chamber on the microscope stage. Immediately check that the mouthpiece is still in the fish's mouth and the outflow tubes didn't shift and are working properly. Coil inflow tube around the heat block. Insert overflow sensor into the chamber. Add temperature probe.

**21.** Apply silicone grease to the "O" ring that holds the overflow tube in place.

**22.** Place one end of the overflow tube in a flask or other receptacle to capture any overflow water. Insert the other end of the overflow tube into the overflow hole in the 3D printed chamber.

**23.** Secure the "O" ring to the overflow tube inside the 3D printed chamber.

**Tips and Tricks**

1. Check to make sure that you have created a watertight seal between the chambered coverglass and 3D printed chamber by filling the 3D printed chamber with water and waiting a few minutes to detect leaks. The seal should even be able to withstand gentle pressure from underneath the coverglass.
1. Periodically check the water level in the chamber. Check the outflow by making sure that the outflow tubes are dripping media into the media bottle.
2. The eggs inside of gravid females are very delicate. Too much pressure on the abdomen can damage eggs and result in fish death.
3. Fish should not be fed the day of an overnight intubation. This will prevent feces from interfering with imaging, fouling water quality, and prevent regurgitation.
4. For post-intubation revival, replace the tricaine media with non-tricaine-containing media and leave the fish intubated for approximately 15 minutes longer. After beginning the revival process, observe the fish for continuously for signs of recovery (apercular and jaw movement) using transmitted light and a low magnification objective (4X or 2X), removing the fish from the intubation chamber when these movements become pronounced and regular.

Fig S1b. Intubation Setup Instructions Part 2

## Overnight Intubation Temperature Recording

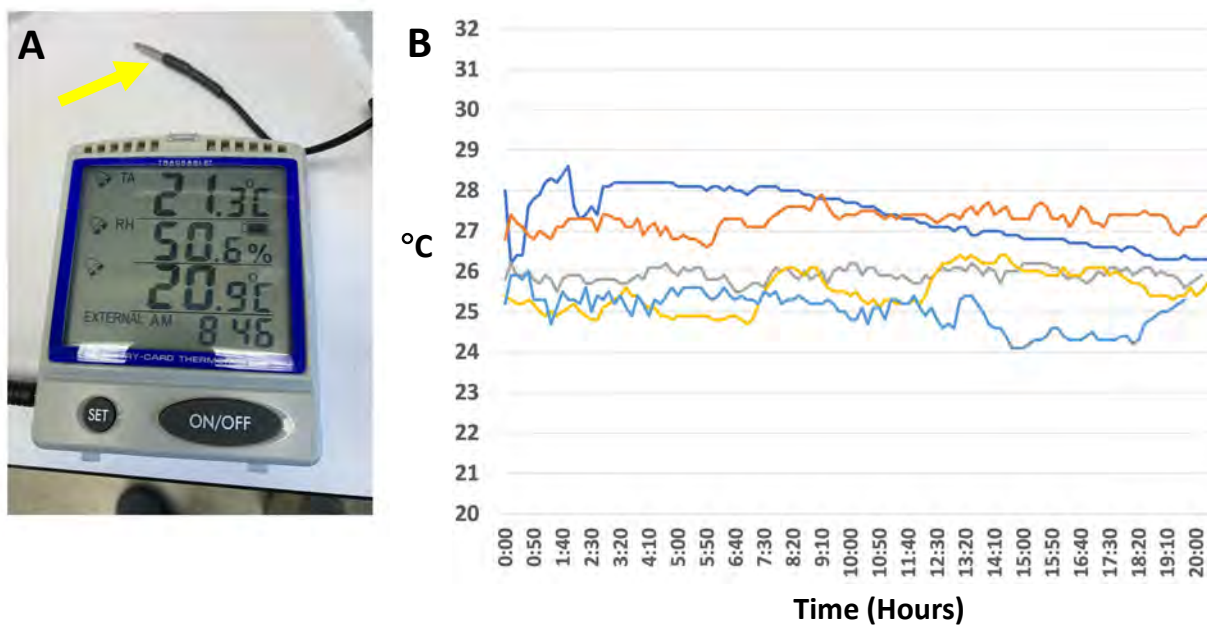

**Fig. S2. Overnight Temperature Recordings of Intubation Chamber**

**A.** Fisherbrand Traceable thermometer (cat# 15-081-111) with probe (yellow arrow) used to measure the water temperature inside the intubation chamber. **B.** Temperature plots from 5 different overnight intubations. Temperature was maintained between 24 and 28 degrees, with individual runs staying within 2 °C.

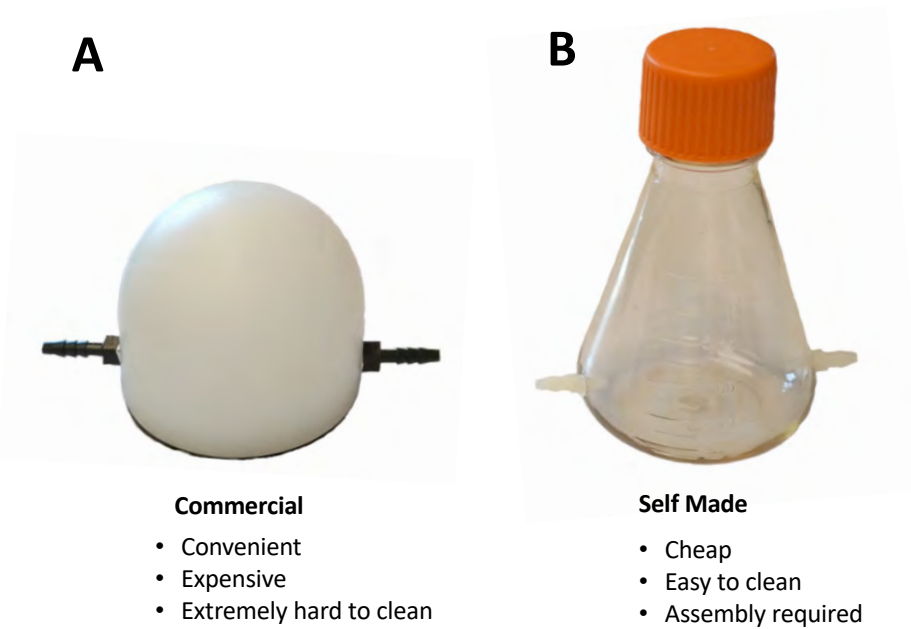

**Fig. S3. Pulse dampeners are used to reduce fish movement caused by the pulsatile flow created by the peristaltic pump. A.** Commercially available pulse dampener (Materflex Item# HV-07596-20). **B.** Self made pulse dampener made of a plastic Erlenmeyer flask with holes drilled in the side and tube fittings glued in with epoxy.

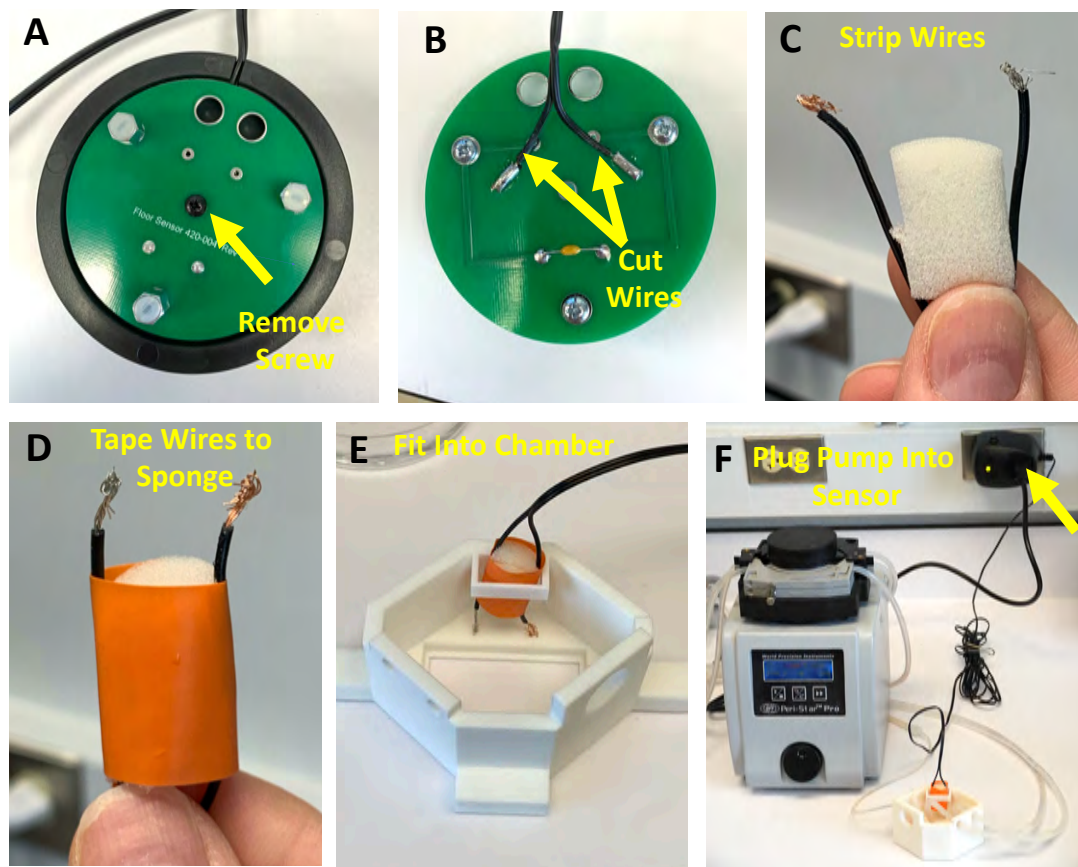

**Fig. S4. Modification of water sensor to fit in 3D printed chamber**

**A.** Ventral view of water sensor showing the screw that needs to be removed. **B.** Inside of water sensor showing where to cut wires. **C.** Cut and stripped wires. **D.** The wires held around a sponge with vinyl tape. **E.** The modified sensor in the 3D printed chamber. **F.** The peristaltic pump plugged into the water sensor which is plugged into the outlet (yellow arrow).

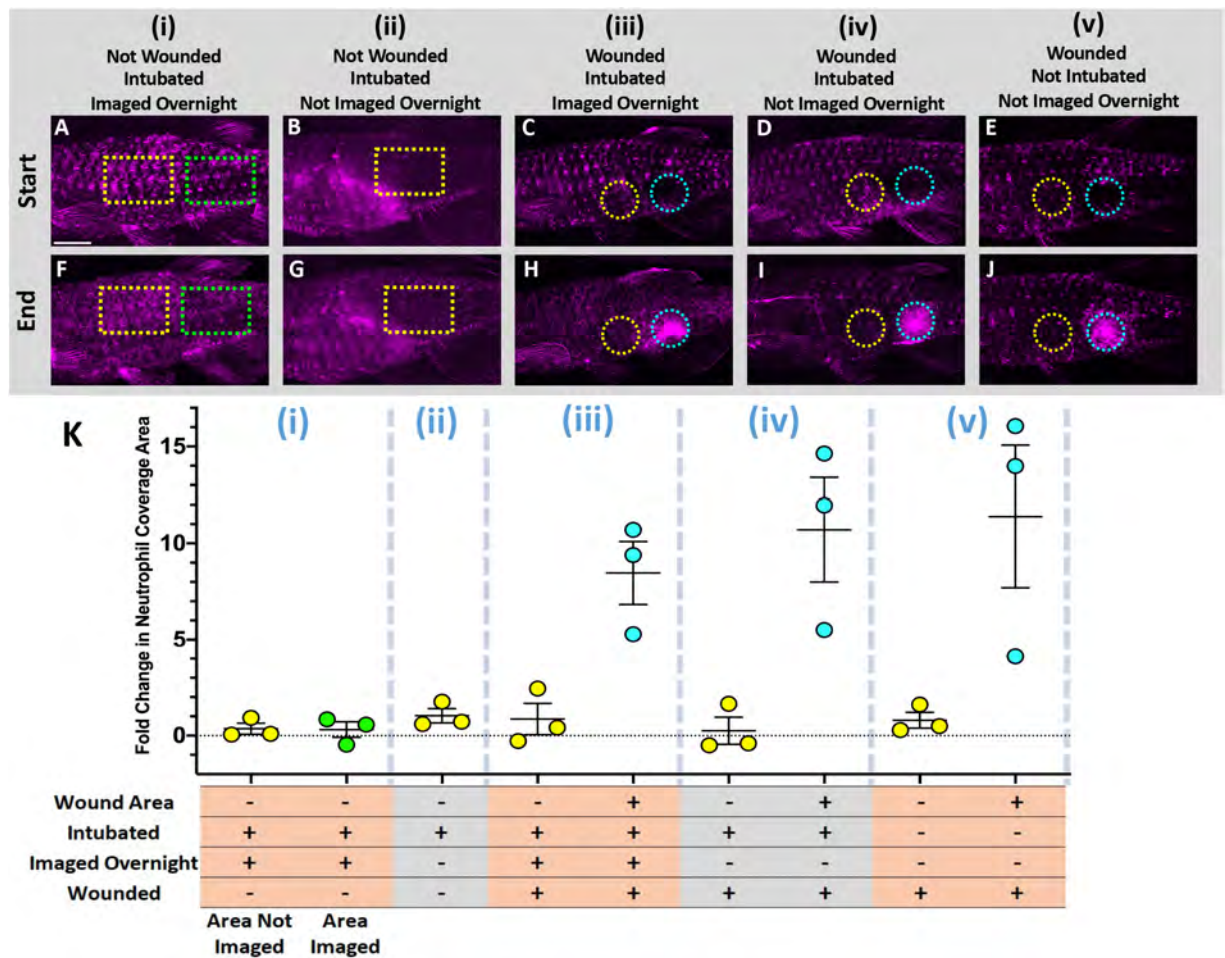

### Fig S5. Quantification of changes in neutrophil coverage in adult fish in overnight experiments

**A-J.** Representative confocal micrographs of adult casper *Tg(lyz:DsRed2)<sup>NZ50</sup>* transgenic zebrafish with fluorescent neutrophils (magenta), at the start (**A-E**) and end (**F-J**) of overnight (at least 20 hour) tests with areas quantified in panel **K** shown by dashed rectangles and circles. Five sets of 3 fish each were treated as follows: **(i)** not wounded, intubated, with the green area imaged continuously overnight and the adjacent yellow area only imaged at the start and end of the experiment; **(ii)** not wounded, intubated, only imaged at the start and end of the experiment; **(iii)** wounded, intubated, with the wounded area (cyan) and an adjacent unwounded area (yellow) both imaged continuously overnight; **(iv)** wounded, intubated, with the wounded area (cyan) and an adjacent unwounded area (yellow) both imaged only at the start and end of the experiment; **(v)** wounded, not intubated, with the wounded area (cyan) and an adjacent unwounded area (yellow) both imaged only at the start and end of the experiment; . **K.** Plot showing the mean ( $\pm$  SEM) fold change in neutrophil coverage area calculated for the regions shown by the rectangles and squares above. Adjacent Shaded areas (salmon and grey) represent different areas measured from the same fish ( $n = 3$  fish for each treatment). The mean area of neutrophil coverage in all three wound areas (cyan) was significantly greater than the control areas in the same fish ( $p < 0.05$  Holm-Bonferroni corrected) Scale bar = 2 mm.

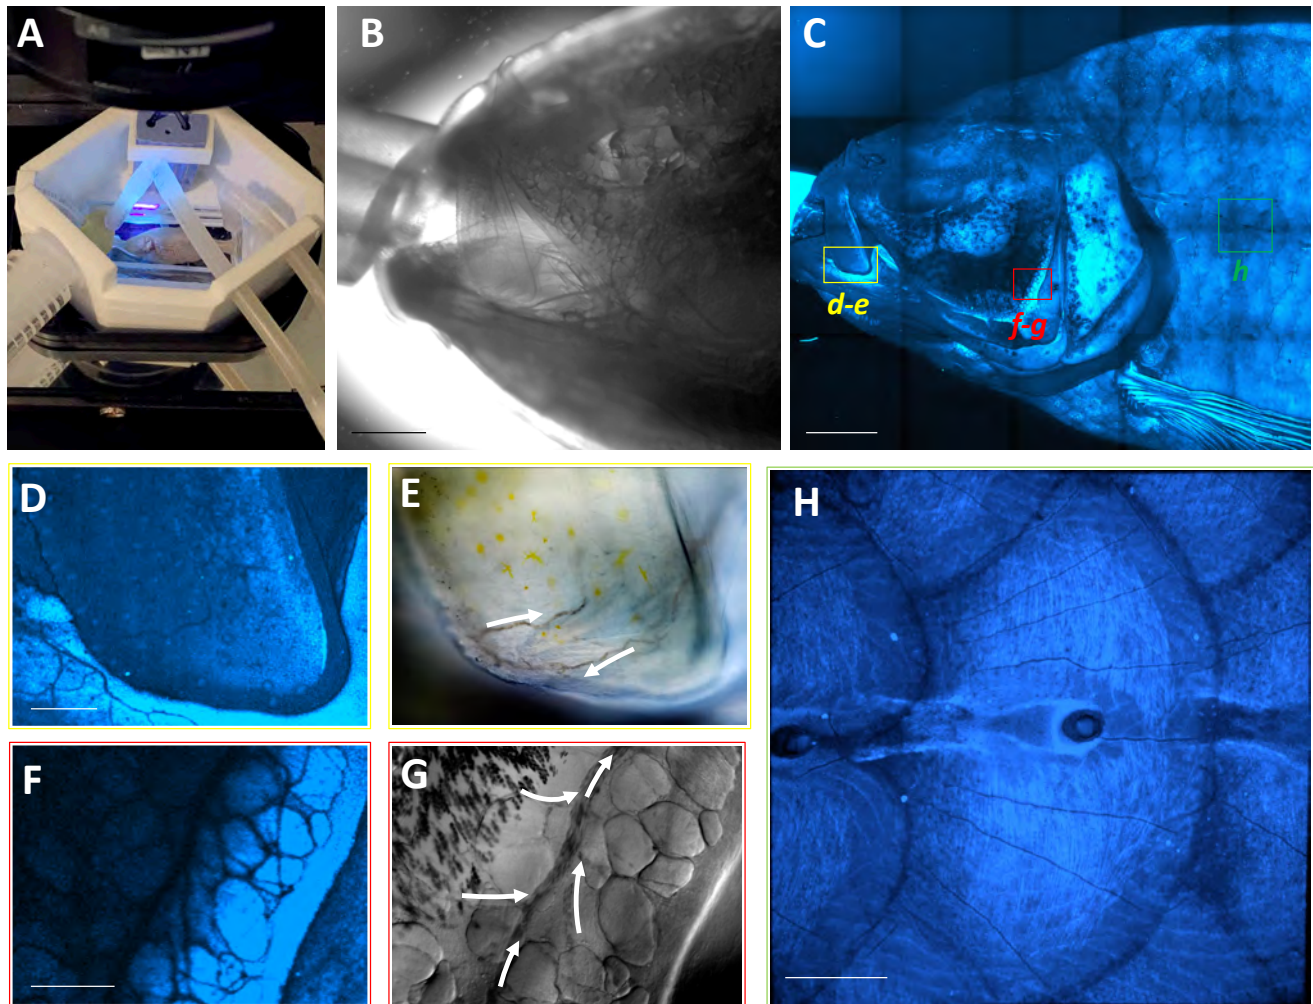

**Fig. S6. Intubation and imaging of Mexican Cavefish (*Astyanax mexicanus* – Pachon)**

**A.** Cavefish intubated and being imaged on spinning disk confocal. **B.** Close up transmitted light image of the intubation tube inside the cavefish's mouth. **C.** Overview confocal tile scan of autofluorescence in the bones and scales of the cavefish. **D-E** Close up fluorescent (**D**) and transmitted light (**E**) image of the maxilla with white arrows showing the direction of blood flow. **F-G** Close up fluorescent (**F**) and transmitted light (**G**) image of the preoperculum with white arrows showing the direction of blood flow. **H.** Close up of autofluorescence in a scale showing the lateral line. See **Supp Movie 3** for videos. Scale bars: **B** 1 mm, **C** 2 mm, **D,H** 250  $\mu$ m, **F** 200  $\mu$ m.

Table S1. Materials List

| Item                       | Description                                                                                   | Supplier                                                     | Part Number                                                                                 |
|----------------------------|-----------------------------------------------------------------------------------------------|--------------------------------------------------------------|---------------------------------------------------------------------------------------------|
| 3D printed Chamber         | Fits on microscope stage, holds LabTek dish                                                   | Xometry / Xometry.com                                        | 3D renderings in supplement, Nylon 12 (SLS)                                                 |
| Lab Tek II Imaging Dish    | Single chamber glass bottomed imaging dish #1.5 coverglass                                    | ThermoFisher / ThermoFisher.com                              | Lab-TekII #155360                                                                           |
| Peristaltic Pump           | Pumps fish water through chamber                                                              | World Precision Instruments / wpiinc.com                     | World Precision Instruments Peri-Star™ Pro Cat# PERIPRO -4L                                 |
| Silicone Grease            | Seals Lab Tek dish into chamber                                                               | Grainger / grainger.com                                      | SG-ONE™ 24708                                                                               |
| Water Supply Tubing (pump) | Supplies water to chamber through peristaltic pump                                            | US Plastics / usplastic.com                                  | Tygon 3350<br>3/32" ID X 7/32" OD                                                           |
| Small Inflow Tubing        | Brings water from supply tubing into chamber                                                  | US Plastics / usplastic.com                                  | Tygon 3350<br>1/32" ID X 3/32" OD                                                           |
| Intubation Tubing          | Small tube that fits in fish's mouth                                                          | World Precision Instruments / wpiinc.com                     | Flexible PE Tubing, 0.6mm ID, 1.1mm OD # 504280                                             |
| Overflow Tubing            | Large diameter tubing for emergency overflow                                                  | US Plastics / usplastic.com                                  | Tygon S3 E-3603 1/2" ID, 3/4 OD, 1/8" wall                                                  |
| Outflow Elbows             | Elbow that changes the direction of the outflow tube inside the 3D printed chamber            | US Plastics / usplastic.com                                  | 1/8" to 5/32" Kartell Polypropylene Elbow Connector # 64256                                 |
| Overflow Fitting           | Attaches overflow tubing to chamber                                                           | US Plastics / usplastic.com                                  | 1/2" to 5/8" Kartell Polypropylene Straight Hose Barb Connector #64114<br>(one end removed) |
| Overflow Gasket            | Gasket that holds overflow fitting in place                                                   | Grainger / grainger.com                                      | Part of O-Ring Kit ASTM D2000                                                               |
| Tube Fitting Kit           | Attaches tubes together                                                                       | World Precision Instruments / wpiinc.com                     | Luer-to-Tubing Coupler Assortment Kit # 504954                                              |
| Modeling Clay              | Holds intubation tube in place                                                                | Various                                                      | Dixon Modeling Clay DIX00740                                                                |
| Emergency Shut Off Switch  | Modified "WasherWatcher Laundry Tub Overflow Protector" or "WaterWatcher Leak Detector Alarm" | HydroCheck, STAK Enterprises Inc. www.hydrocheckproducts.com | WasherWatcher Leak Detector Alarm                                                           |
| Sponge                     | Holds fish in place                                                                           | Cole Parmer / Coleparmer.com                                 | Jaece Identi-Plugs L800-D                                                                   |
| Heat Block                 | Warms fish water                                                                              | Southwest Science / southwestscience.com                     | SH100 Mini Dry Bath Hot Block, SWMINI-5 block insert                                        |
| Digital Thermometer        | Thermometer for monitoring and recording chamber water temperature                            | Fisher Scientific / Fishersci.com                            | Fisherbrand Traceable Thermometer Cat# 15-081-11                                            |
| Air Pump With Air Stone    | Aerates fish water in water bath                                                              | Various                                                      | Any, for small home aquarium                                                                |
| Tokei Hit Heated stage A   | Keeps microscope samples warm                                                                 | Tokei Hit / Nikon Instruments                                | Model: INUB-TIZB                                                                            |
| Tokei Hit Heated stage B   | Keeps microscope samples warm (fits 96 well plate)                                            | Tokei Hit / Nikon Instruments                                | Model: STZF-TIZWX-SET                                                                       |
| Soft Tip Tweezers          | Tweezers used to manipulate fish for intubation                                               | Fisher Scientific / Fishersci.com                            | Exceltra 162DRT Cat# 18-100-921                                                             |
| Pulse Dampener             | Reduces pulsatile movement caused by pump                                                     | Masterflex / Masterflex.com                                  | Masterflex Item# ZY-07596-20                                                                |



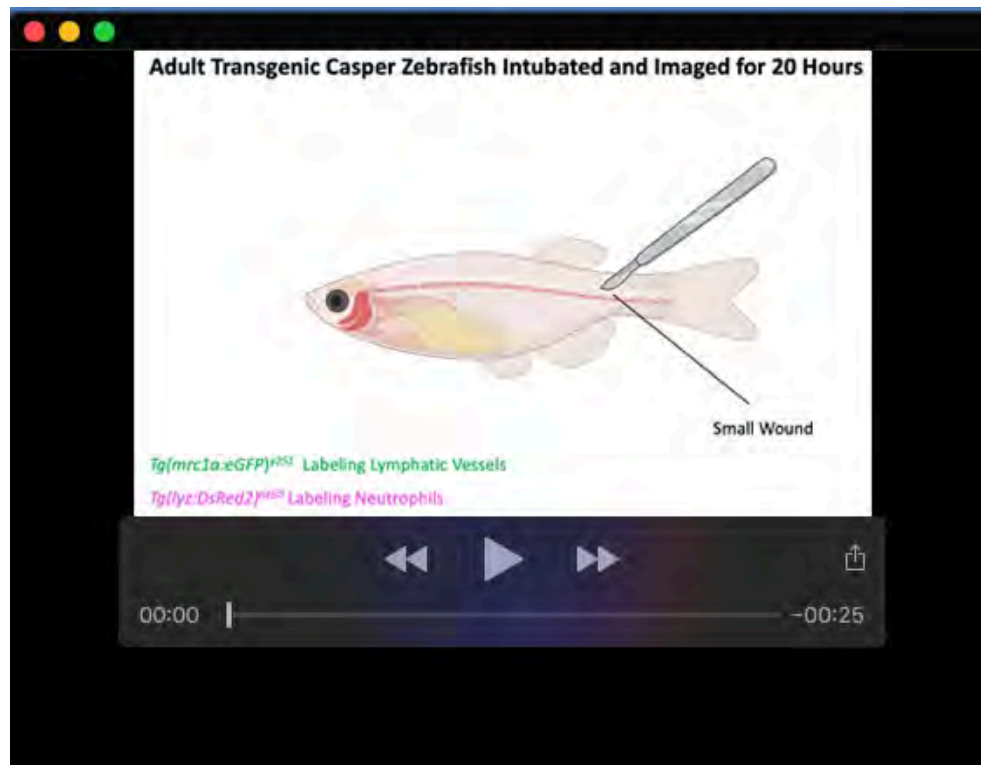

**Movie 1. Time-lapse imaging of neutrophil recruitment to a scale removal wound in an intubated adult zebrafish.**

**0-4"** Schematic diagram an adult casper *Tg(lyz:DsRed2)<sup>N250</sup>;Tg(mrc1a:eGFP)<sup>N251</sup>* double transgenic zebrafish with fluorescent neutrophils (magenta) and lymphatic vessels (green). The approximate site of scale removal by abrasion with a scalpel is noted with a yellow box. **5-10"** Adult fish being imaged in the intubation chamber on an inverted confocal microscope, using blue, green and purple (near-UV) excitation light. **11-31"** Time-lapse imaging of the wound site of an adult fish collected with a 2X objective from 0 – 19 hours post wounding and intubation **31-38"** Close-up of the wound site collected with a 10X objective at 19-20 hours post wounding and intubation. **38-44"** High magnification closeup of neutrophils (magenta) actively migrating in and around lymphatic vessels (green) in the recovering wound site of a live adult zebrafish collected with 20X objective from 23 – 24 hours post wounding and intubation.

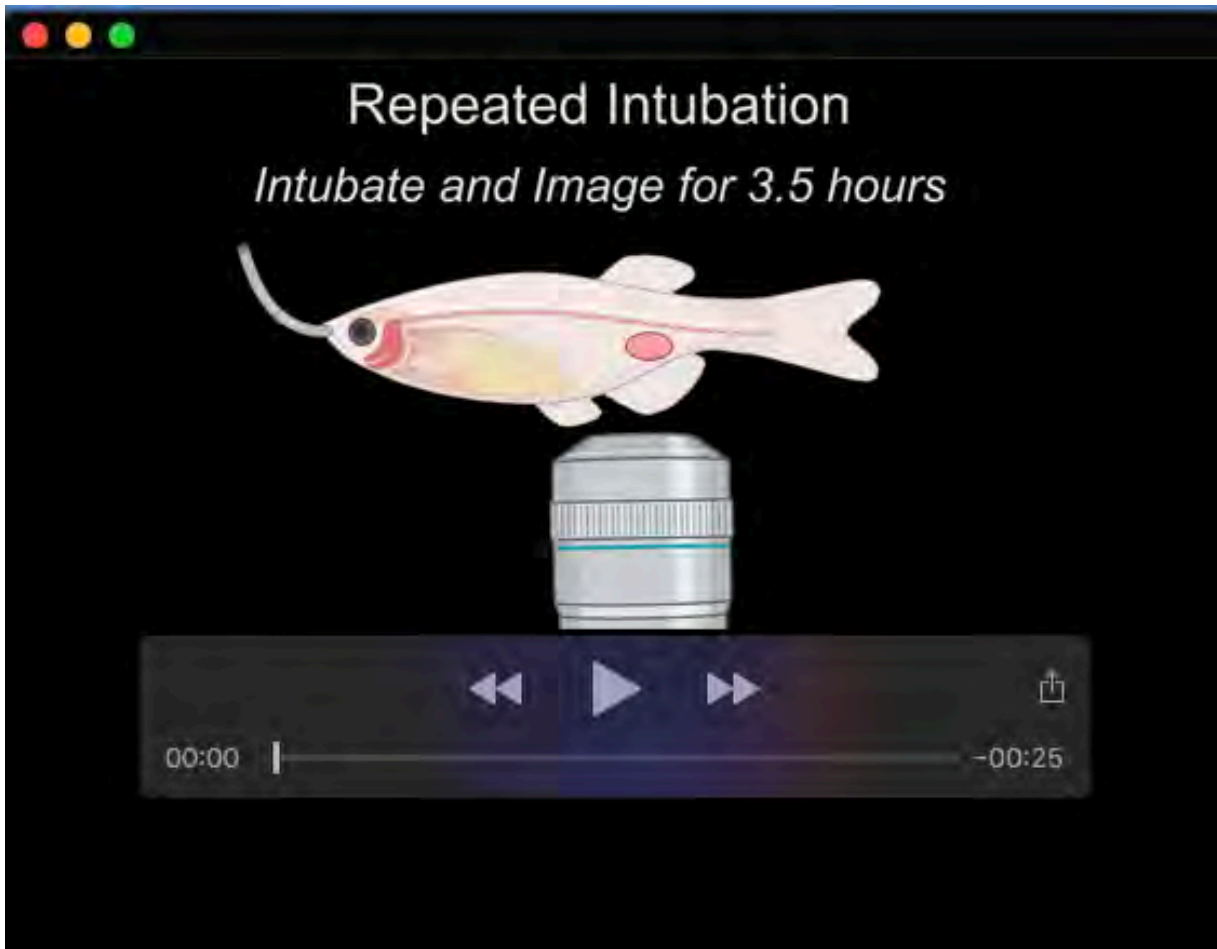

**Movie 2. Repeated time-lapse imaging of neutrophil recruitment to a scale removal wound in an intubated adult zebrafish.** **0-14"** Schematic diagram showing experimental setup: an adult casper *Tg(lyz:DsRed2)<sup>NZ50</sup>;Tg(mrc1a:eGFP)<sup>y251</sup>* double transgenic zebrafish with fluorescent neutrophils (magenta) and lymphatic vessels (green) is wounded, intubated and imaged for 3.5 hours then returned to the aquaculture system. Imaging and intubation (3.5 hours) is repeated at day 1, 2, and 7 post injury. **15-25"** Time lapse, 0.5-4 hours post injury. **25-34"** Time lapse, 24-27 hours post injury. **35-42"** Time lapse, 48-51.5 hours post injury. **43-52"** Tile image of entire intubated fish at 7 days post injury, zooming to wound site. **53-1:09"** 3.5 hour time lapse of wound site at 7 days post fertilization including increased magnification.

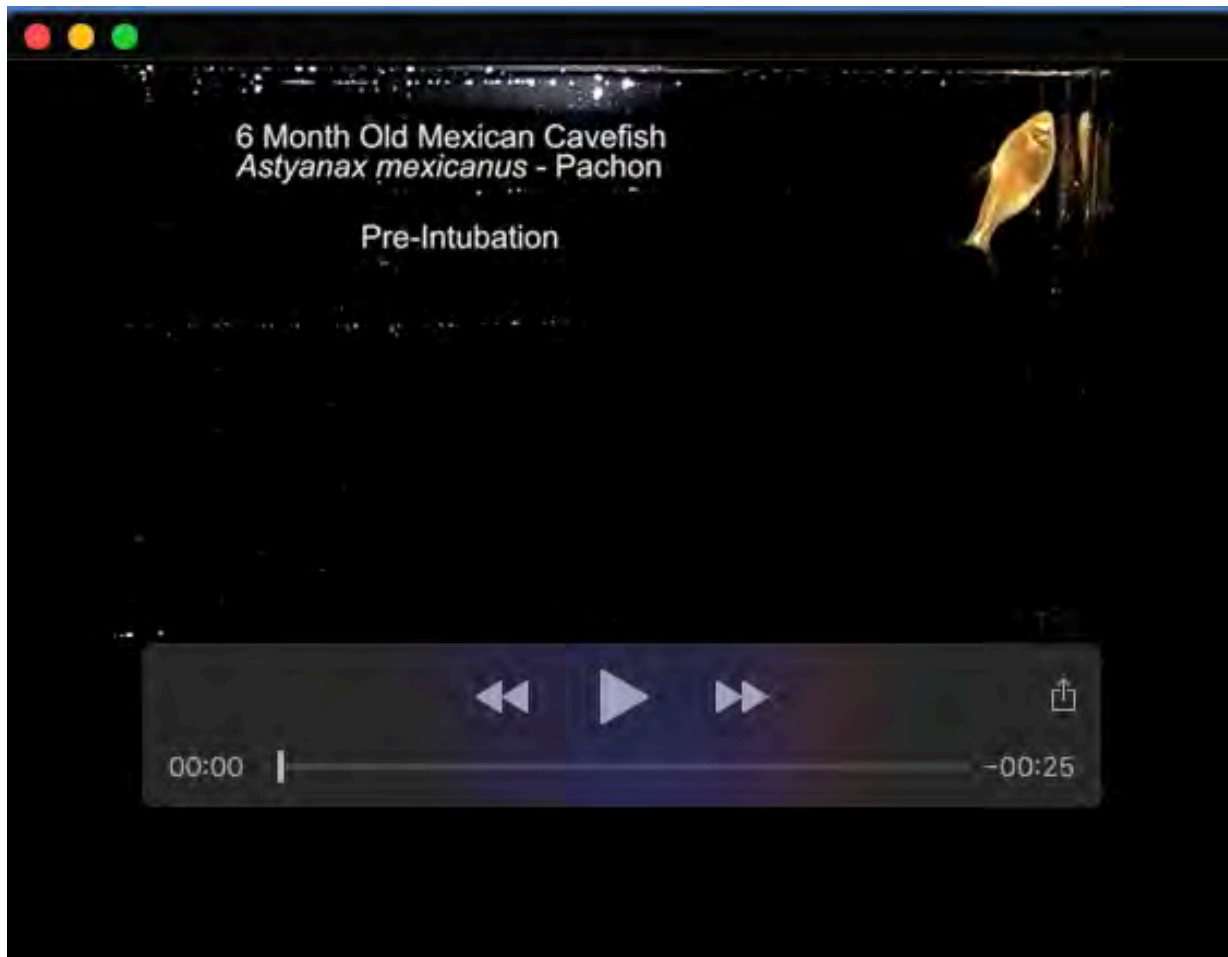

**Movie 3. Intubation and imaging of Mexican Cavefish (*Astyanax mexicanus* – Pachon).** 0-6" A six-month old cavefish swimming before intubation. 7-12" Cavefish intubated and being imaged on an inverted spinning disk confocal microscope. 13-17" Overview of 405 nm autofluorescence tile zooming in to scale/lateral line region. 18-27" 3D rendering of scale lateral line region. 28-33" Pan from scale to preoperculum. 34-41" Transmitted light movie (black and white) in real-time showing blood flowing through the preoperculum. 42-49" Pan from preoperculum to maxilla. 50-57" Transmitted light movie (color) in real-time showing blood flowing through maxilla. 58-1:02 Pan from maxilla to entire mouth showing intubation. 1:03-1:23" Transmitted light movie (sped up 15X) showing cavefish being revived with fresh system water. 1:24-1:35" Cavefish swimming after 3.5 hour intubation.

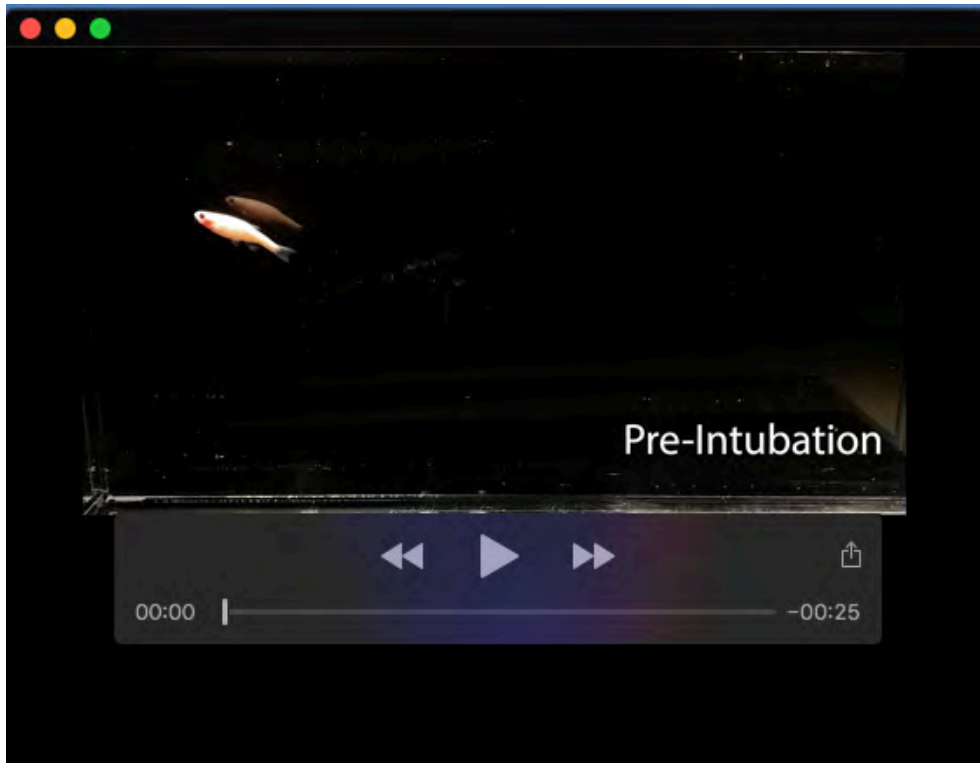

**Movie 4. Adult zebrafish pre intubation, being intubated, being revived, and post intubation.** **0-10"**Adult zebrafish swimming before overnight intubation. **10-28"** Intubation tube being carefully inserted into the mouth of an adult zebrafish. **29-57"** Intubated adult zebrafish being revived by substituting fresh system water for tricaine water in the intubation system. **58-1:06"**Adult zebrafish swimming after overnight intubation.
